# Supplementary material for: Intestinal Epithelium-Derived Luminally Released Extracellular Vesicles in Sepsis Exhibit the Ability to Suppress TNF-α and IL-17A Expression in Mucosal Inflammation
Source: PubMed Central journal article supplement (PMC7696152; doi:10.3390/ijms21228445), 2020-11-10
Supplement: ijms-21-08445-s001.pdf [file ijms-21-08445-s001.pdf]

Figure S1

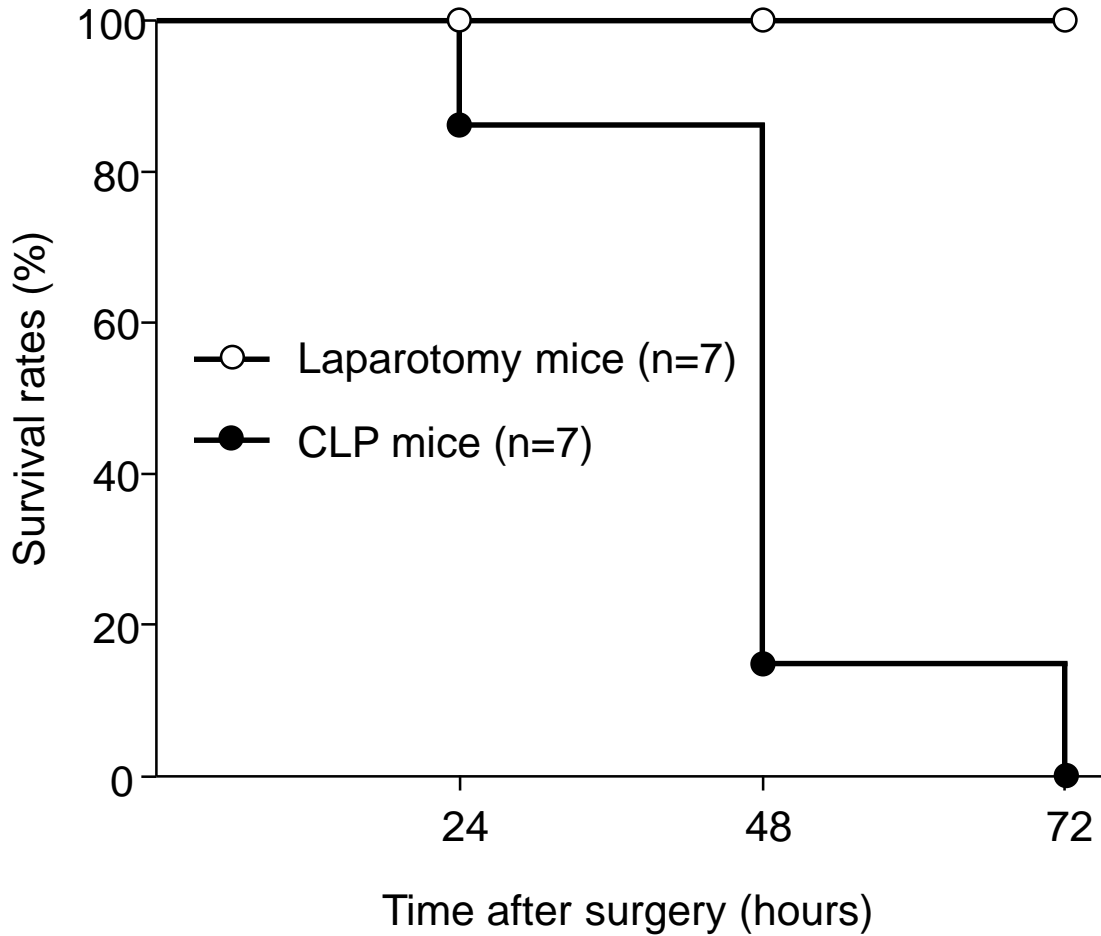

**Figure S1.** Monitoring of survival rates in mice following CLP or sham operation (laparotomy). Mortality of mice was observed for 72 hours. CLP (n=7) and laparotomy (n=7) mice were used in this assay.

## Figure S2

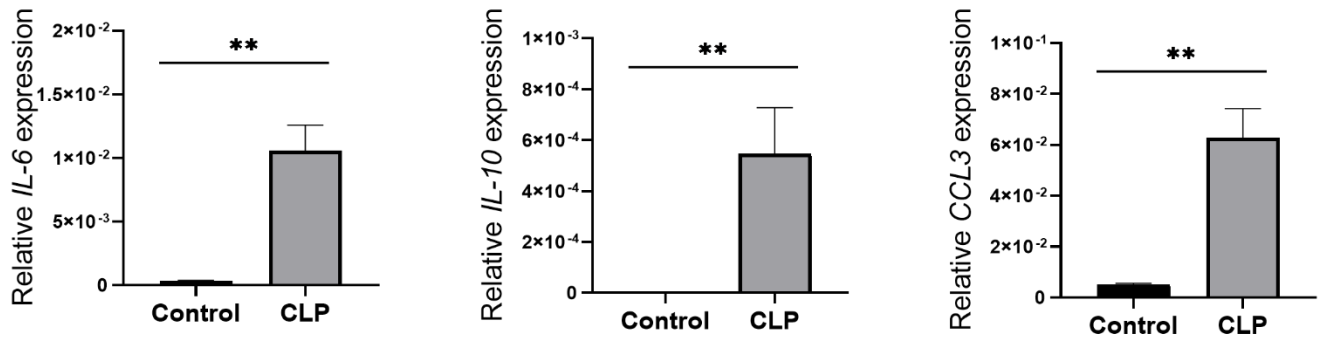

**Figure S2.** RT-qPCR analysis for gene expression. PBMCs were isolated from sham-operated control and CLP mice. RNA was extracted from the cells and analyzed for mRNA expression of the genes indicated. Relative expression of *IL-6*, *IL-10*, and *CCL3* to  $\beta$ -actin using  $2^{-\Delta CT}$  method. Statistical significance was obtained by unpaired two-tailed t test. Whole blood from 3 mice was pooled, resulting in 4 blood samples per group (N=12). Extracted RNA was subjected to RT-qPCR assay. Results are shown as the mean  $\pm$  SEM. \*\* $p < 0.01$ .

Figure S3

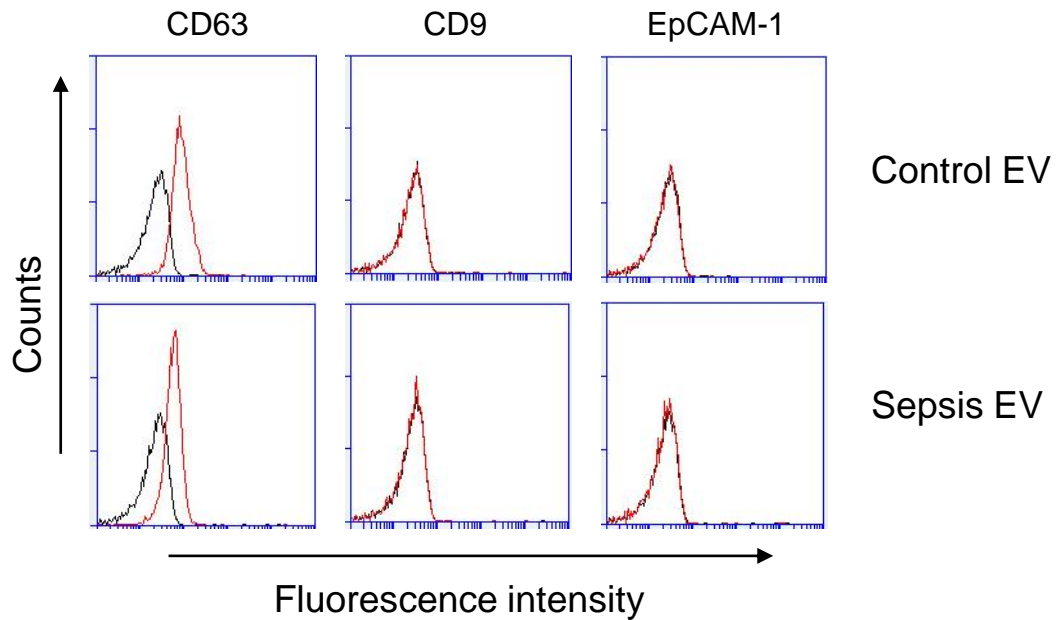

**Figure S3.** Flow cytometry analysis of luminal EVs isolated from control and septic mice. EVs were isolated from lavage fluids in small intestines of control and sepsis mice using differential UC. EVs were then adsorbed on 4  $\mu\text{m}$  poly-L-lysine microbeads overnight. Immobilized EVs (20  $\mu\text{g}$ ) were stained with antibodies to mouse CD63, CD9, and EpCAM-1 and subjected to flow cytometry to evaluate their expression. Representative histograms show changes in expression of indicated markers. Black lines, isotype control; and red lines, monoclonal antibody (MAb).

Figure S4

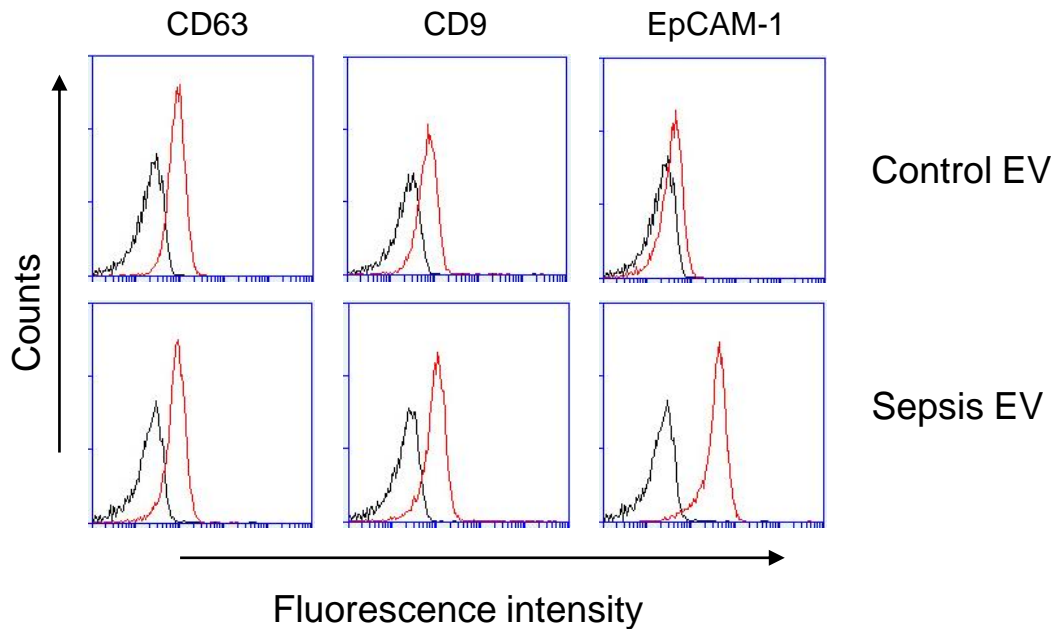

**Figure S4.** Flow cytometry analysis of luminal EVs isolated from large intestines of control and septic mice using C-DGUC. EVs were then adsorbed on 4  $\mu\text{m}$  poly-L-lysine microbeads overnight. Immobilized EVs (20  $\mu\text{g}$ ) were stained with antibodies to mouse CD63, CD9, and EpCAM-1 and subjected to flow cytometry to evaluate their expression. Representative histograms show changes in the expression levels of the indicated markers. Black lines, isotype control; and red lines, monoclonal antibody (MAb).

Figure S5

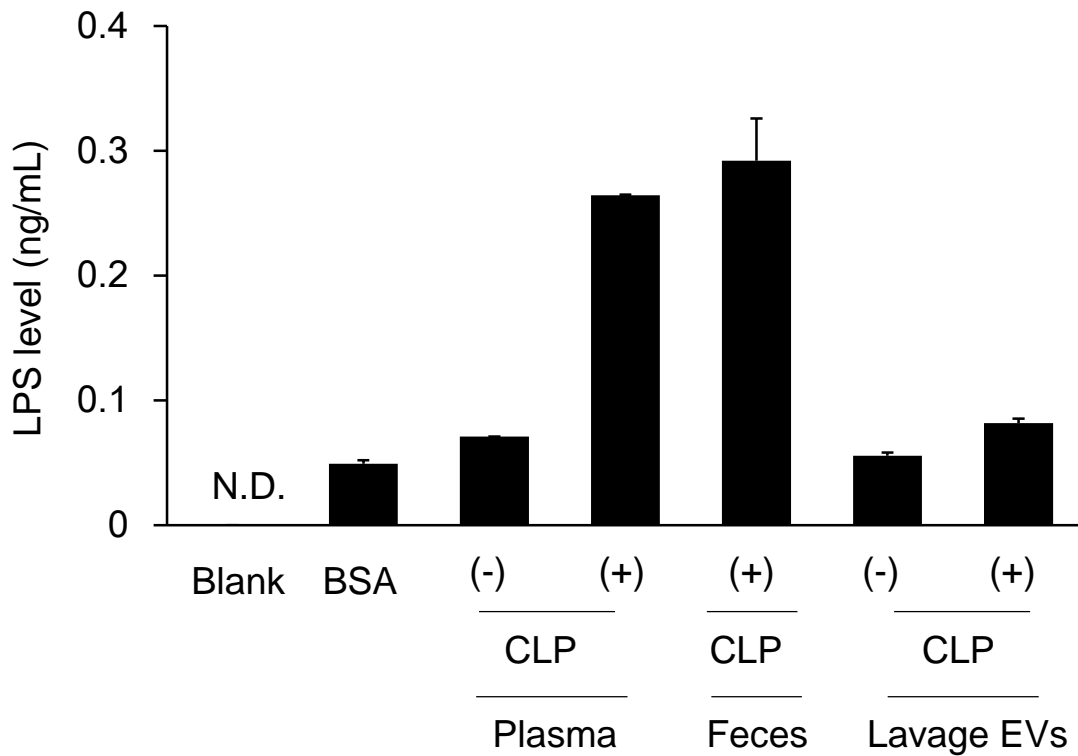

**Figure S5.** Determination of bacterial endotoxin (lipopolysaccharide; LPS) levels in EV samples. The EV samples were applied to an antibody-coated ELISA plate and analyzed for lipid A content. All samples had an equal concentration of 0.5 mg/ml. BSA was used as a negative control. Bar graphs represent the mean  $\pm$  SEM obtained from 2-5 mice per group. BSA, bovine serum albumin.

Figure S6

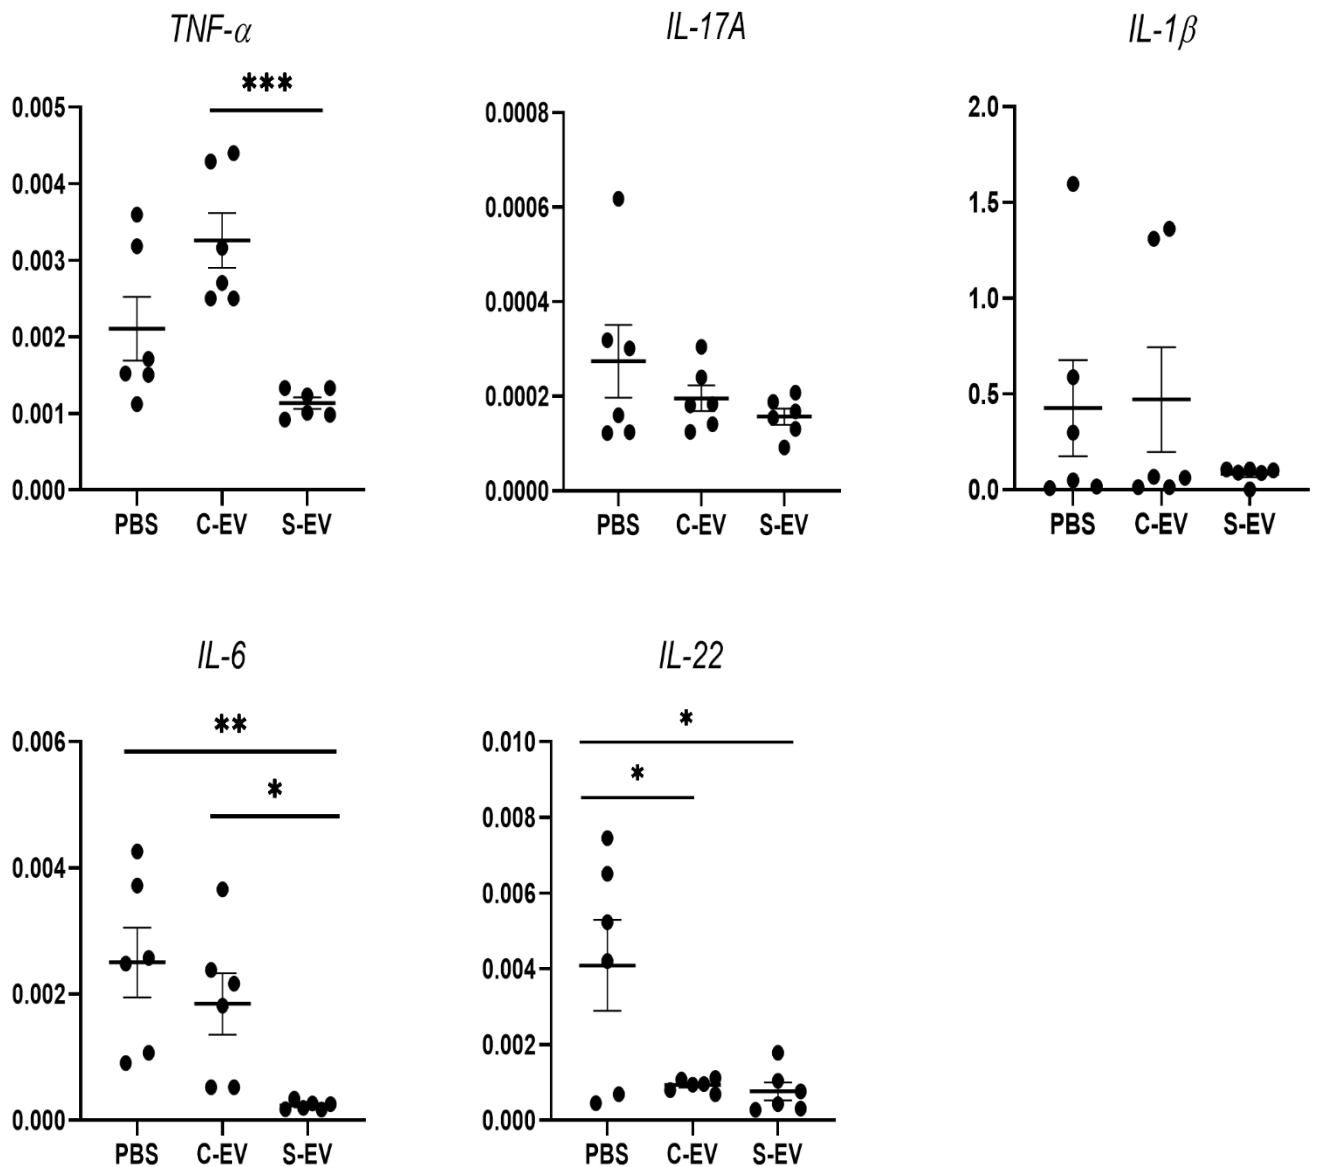

**Figure S6.** RT-qPCR analysis for gene expressions of *TNF-α*, *IL-17A*, *IL-1β*, *IL-6*, and *IL-22*. Relative expression of genes in ileal-loop tissues of the healthy mice treated with the EVs isolated by UC. PBS, phosphate-buffered saline (200  $\mu$ L); C-EV, control EVs (50  $\mu$ g/200  $\mu$ L) injected; S-EV, sepsis EVs (50  $\mu$ g/200  $\mu$ L) injected into ileal space. Other abbreviations: *TNF-α*, tumor necrosis factor- $\alpha$ ; IL, interleukin. N=6 mice per group. \* $p$ <0.05; \*\* $p$ <0.01; and \*\*\* $p$ <0.001.

Figure S7

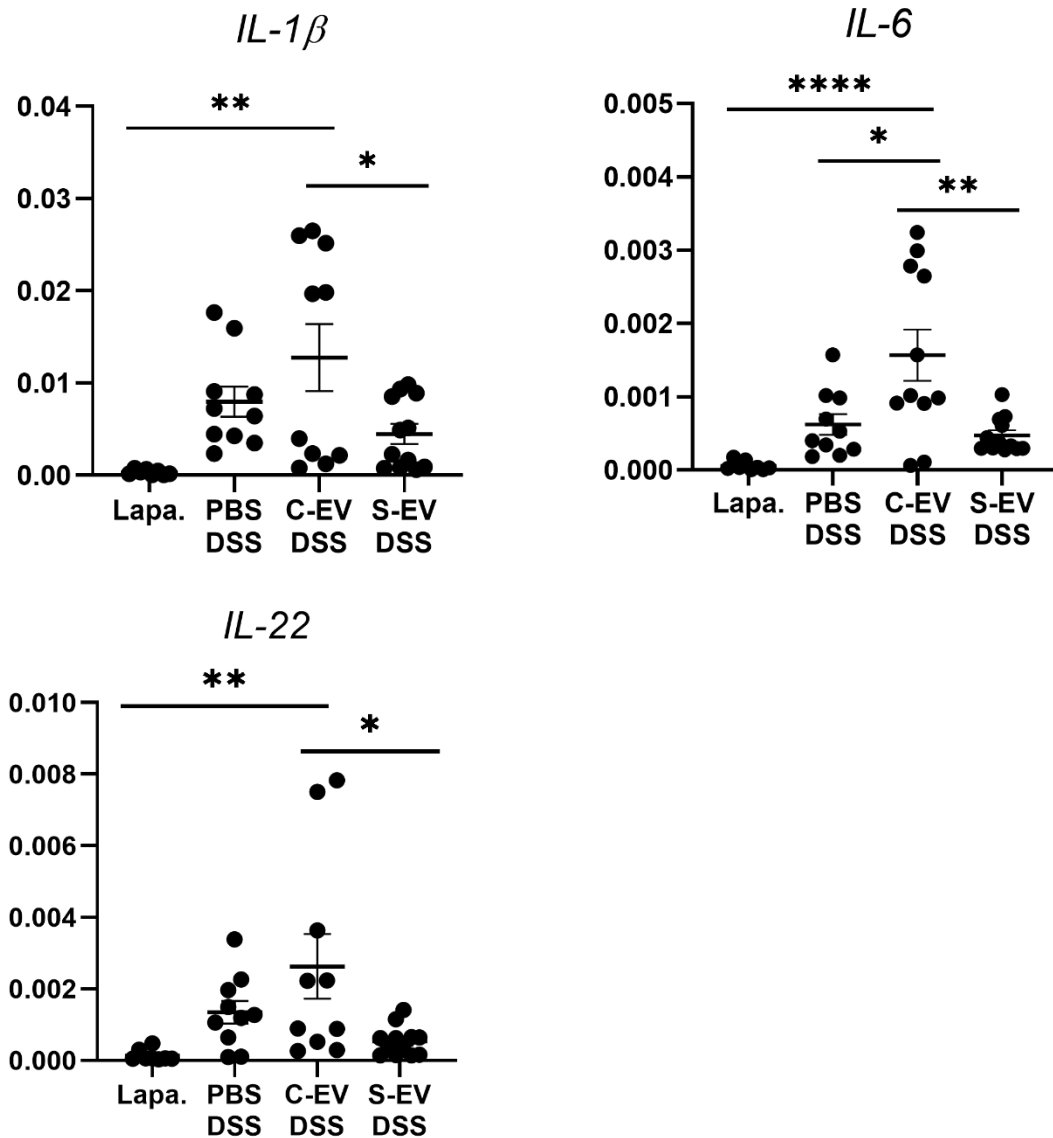

**Figure S7.** RT-qPCR analysis for gene expressions of *IL-1β*, *IL-6*, and *IL-22*. Relative expression of genes in ileal-loop tissues of the gut-inflamed mice treated with the EVs isolated by UC. Lapa, Laparotomy; PBS, phosphate-buffered saline (200  $\mu$ L); C-EV, control EVs (50  $\mu$ g/200  $\mu$ L) injected; S-EV, sepsis EVs (50  $\mu$ g/200  $\mu$ L) injected into ileal space. Other abbreviations: TNF- $\alpha$ , tumor necrosis factor- $\alpha$ ; IL, interleukin. N=8-12 mice per group. \* $p$ <0.05; \*\* $p$ <0.01; and \*\*\* $p$ <0.001.

Figure S8

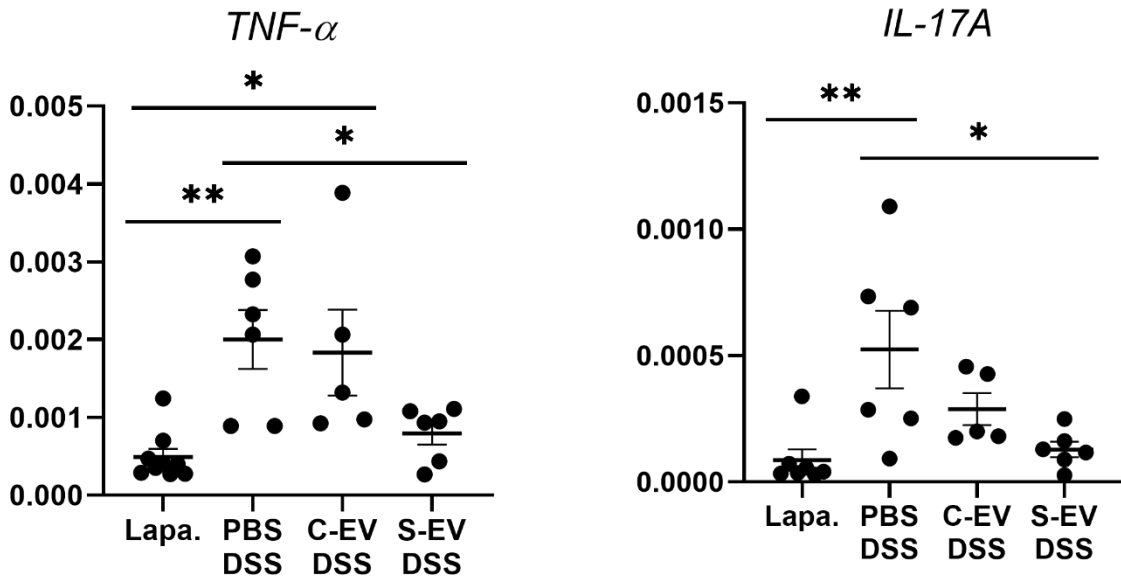

**Figure S8.** RT-qPCR analysis for gene expressions of *TNF- $\alpha$*  and *IL-17A*. Relative expression of genes in ileal-loop tissues of the gut-inflamed mice treated with the EVs isolated by C-DGUC. Lapa, Laparotomy; PBS, phosphate-buffered saline (200  $\mu$ L); C-EV, control EVs (50  $\mu$ g/200  $\mu$ L) injected; S-EV, sepsis EVs (50  $\mu$ g/200  $\mu$ L) injected into ileal space;. Other abbreviations: *TNF- $\alpha$* , tumor necrosis factor- $\alpha$ ; *IL-17A*, interleukin-17A. N=5-8 mice per group. \* $p$ <0.05; and \*\* $p$ <0.01.



Figure S9

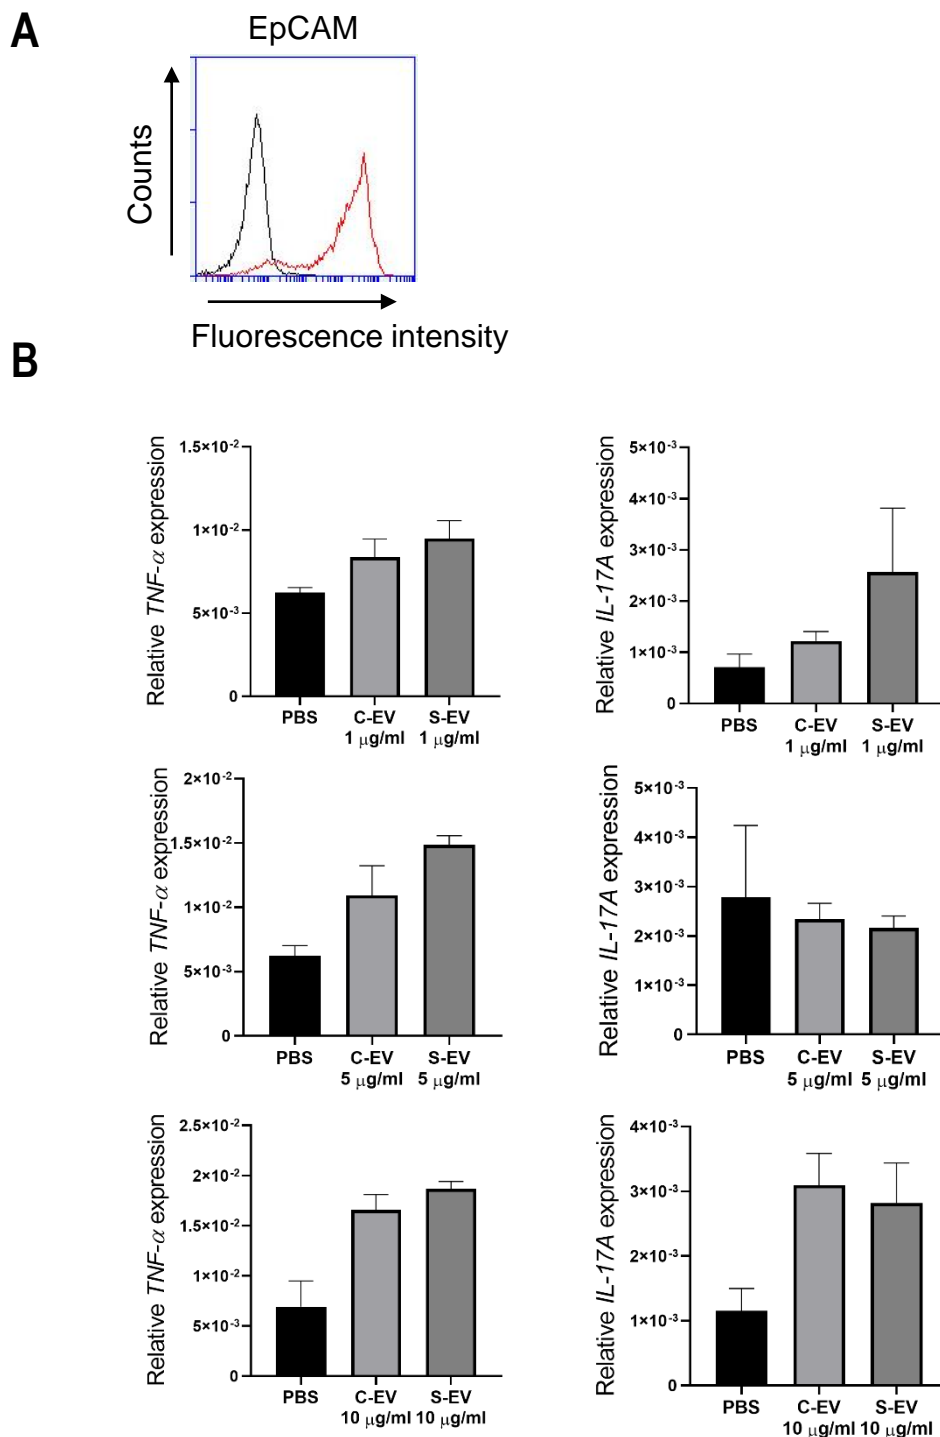

**Figure S9.** Confirmation of EpCAM expression and analysis of EV effects on altering *TNF- $\alpha$*  and *IL-17A* expressions in mouse IECs. (A) Representative histogram for analyzing EpCAM expression using flow cytometry. Black line, isotype control; and red line, anti-EpCAM MAb. (B) The IECs were treated with indicated doses of EVs for 24 hours and then subjected to RT-qPCR. Relative expression of both genes to  *$\beta$ -actin* was analyzed using  $2^{-\Delta CT}$  method. 4 mice per group were used to isolate IECs and 3 to 4 independent experiments were conducted. Results are shown as the mean  $\pm$  SEM.

# Figure S10

**A**

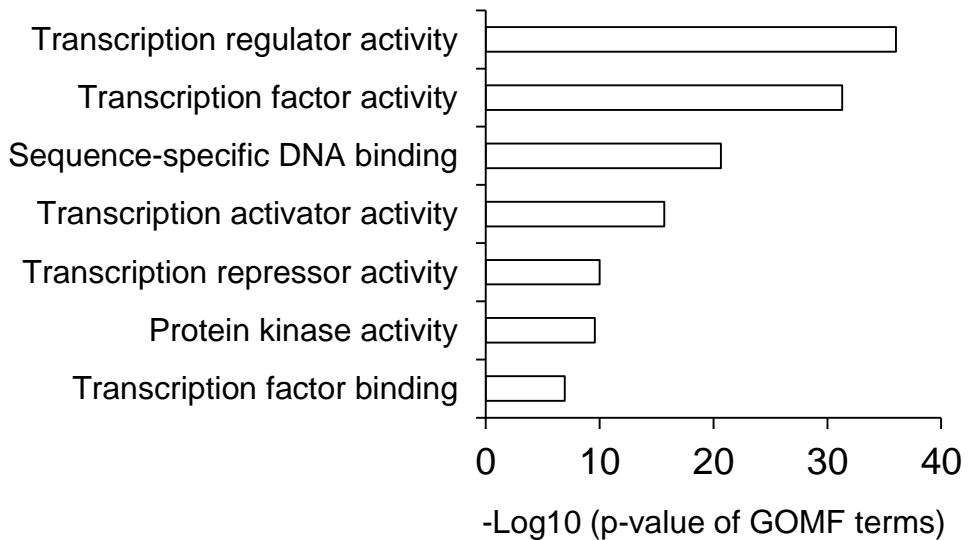

**B**

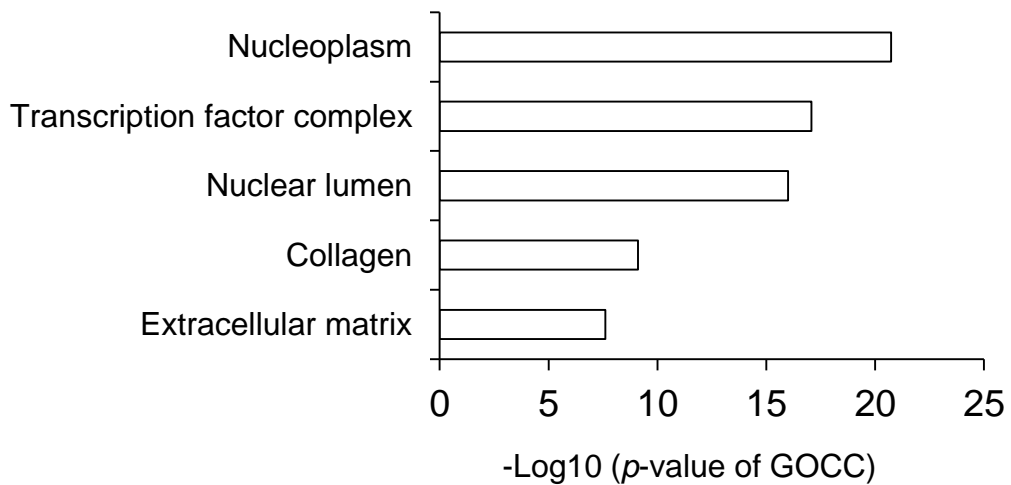

**Figure S10.** Gene Ontology (GO) enrichment analysis. (A) Gene Ontology Molecular Function (GOMF) terms enriched in target genes shared by upregulated microRNAs in septic EVs. (B) Gene Ontology Cellular Component (GOCC) terms enriched in target genes shared by upregulated microRNAs in septic EVs.

**Table S1.** Primer sequences used in RT-qPCR

|                | Forward (5' → 3')         | Reverse (5' → 3')         |
|----------------|---------------------------|---------------------------|
| TNF- $\alpha$  | ATAGCTCCCAGAAAAGCAAGC     | CACCCCGAAGTTCAGTAGACA     |
| IL-17A         | TCTCCACCGCAATGAAGACC      | CACACCCACCAGCATCTTCT      |
| IL-1 $\beta$   | GCCTTGGGCCTCAAAGGAAAGAATC | GGAAGACACAGATTCCATGGTGAAG |
| IL-6           | TGGAGTCACAGAAGGAGTGGCTAAG | TCTGACCACAGTGAGGAATGTCCAC |
| IL-10          | ATAACTGCACCCACTTCCCA      | GGGCATCACTTCTACCAGGT      |
| IL-22          | TTGAGGTGTCCAACCTCCAGCA    | AGCCGGACGTCTGTGTTGTTA     |
| CCL3           | TGAAACCAGCAGCCTTTGCTC     | AGGCATTCAGTTCAGGTCAGTG    |
| $\beta$ -actin | CATCGTACTCCTGCTTGCTG      | AGCGCAAGTACTCTGTGTGG      |
| miR-19a        | TGTGCAAATCTATGCAAACTGA    | Universal primer          |
| miR-21a        | TAGCTTATCAGACTGATGTTGA    | Universal primer          |
| miR-22         | AAGCTGCCAGTTGAAGAACTGT    | Universal primer          |
| miR-27a        | TTCACAGTGGCTAAGTTCCGC     | Universal primer          |
| miR-103-2      | AGCTTCTTTACAGTGCTGCCTTG   | Universal primer          |
| miR-107        | AGCAGCATTGTACAGGGCTATCA   | Universal primer          |
| miR-126a       | TCGTACCGTGAGTAATAATGCG    | Universal primer          |
| miR-146b       | TGAGAACTGAATTCCATAGGCT    | Universal primer          |
| miR-182        | TTTGGCAATGGTAGAACTCACACCG | Universal primer          |
| miR-200b       | TAATACTGCCTGGTAATGATGA    | Universal primer          |
| miR-203        | GTGAAATGTTTAGGACCACTAG    | Universal primer          |
| miR-762        | GGGGCTGGGGCCGGGACAGAGC    | Universal primer          |
| U6             | GCGCGTCGTGAAGCGTTC        | GTGCAGGGTCCGAGGT          |

**Table S2.** All miRNAs detected, RPKM values, and fold changes

| miRNA    | ENSEMBL No.          | RPKM       |           | Fold change<br>(Sepsis/Control EV) |
|----------|----------------------|------------|-----------|------------------------------------|
|          |                      | Control EV | Sepsis EV |                                    |
| Mir6236  | ENSMUSG00000098973.1 | 439627     | 606258    | 1.379028131                        |
| Mir320   | ENSMUSG00000065528.1 | 3538.031   | 49236.06  | 13.91623194                        |
| Mir6240  | ENSMUSG00000098343.1 | 25941.69   | 37420     | 1.442465776                        |
| Mir6239  | ENSMUSG00000098648.1 | 8929.15    | 18945.94  | 2.121807787                        |
| Mir21a   | ENSMUSG00000065455.1 | 718.601    | 16479.41  | 22.93262882                        |
| Mir194-1 | ENSMUST00000083647.1 | 2341.455   | 13078.69  | 5.585710594                        |
| Mir192   | ENSMUSG00000065523.1 | 1360.412   | 10876.74  | 7.995180872                        |
| Mir200a  | ENSMUST00000083466.1 | 225.1512   | 9292.76   | 41.27341982                        |
| Mir23a   | ENSMUSG00000065611.1 | 212.0566   | 7130.2    | 33.62404188                        |
| Mir194-2 | ENSMUSG00000065582.1 | 852.43     | 6371.319  | 7.474301702                        |
| Mir6538  | ENSMUST00000183713.1 | 1926.7486  | 4714.477  | 2.446856326                        |
| Mir2137  | ENSMUSG00000089357.1 | 1657.098   | 4630.18   | 2.794149773                        |
| Mir30d   | ENSMUSG00000065437.1 | 447.204    | 4496.043  | 10.05367349                        |
| Mir200c  | ENSMUSG00000065462.2 | 297.7676   | 3704.962  | 12.44246184                        |
| Mir205   | ENSMUST00000083599.1 | 178.53     | 3678.86   | 20.60639668                        |
| Mir26a-2 | ENSMUSG00000065430.1 | 450.714    | 3621.92   | 8.03596072                         |
| Mir200b  | ENSMUST00000083615.2 | 210.9703   | 3569.403  | 16.91898338                        |
| Mir451a  | ENSMUSG00000070065.1 | 2618.429   | 3531.736  | 1.348799605                        |
| Mir145a  | ENSMUST00000083658.1 | 2828.588   | 3512.51   | 1.24178919                         |
| Mir10a   | ENSMUSG00000065519.1 | 378.0462   | 3413.202  | 9.028531433                        |
| Mir215   | ENSMUSG00000065562.1 | 511.3293   | 3355.749  | 6.56279427                         |
| Mir26a-1 | ENSMUST00000083579.1 | 362.995    | 3071.744  | 8.462221243                        |
| Mirlet7b | ENSMUST00000083630.1 | 603.601    | 2684.378  | 4.447272287                        |
| Mir30c-2 | ENSMUSG00000065567.1 | 304.91402  | 2565.767  | 8.414722944                        |
| Mir429   | ENSMUST00000083493.1 | 317.0862   | 2523.109  | 7.957170637                        |
| Mir141   | ENSMUST00000083540.1 | 0          | 2458.856  |                                    |
| Mir30b   | ENSMUST00000083542.2 | 187.2548   | 2307.965  | 12.32526483                        |
| Mir375   | ENSMUST00000083682.2 | 12.4285    | 2189.302  | 176.151748                         |
| Mir30c-1 | ENSMUSG00000065490.1 | 260.80818  | 2186.087  | 8.381972529                        |
| Mir139   | ENSMUST00000083512.1 | 22.4774    | 2174.319  | 96.73356349                        |
| Mir223   | ENSMUST00000102112.1 | 5.8594     | 2167.223  | 369.8711472                        |
| Mir143   | ENSMUST00000083511.2 | 2896.89    | 2113.505  | 0.729577236                        |
| Mir484   | ENSMUST00000093566.1 | 87.2046    | 2097.76   | 24.05561175                        |
| Mir30a   | ENSMUSG00000065405.2 | 287.4851   | 1958.073  | 6.811041685                        |
| Mir151   | ENSMUSG00000065612.1 | 108.288    | 1933.113  | 17.8515902                         |

|            |                      |           |           |             |
|------------|----------------------|-----------|-----------|-------------|
| Mir23b     | ENSMUSG00000065599.1 | 448.565   | 1752.293  | 3.906441653 |
| Mir29a     | ENSMUST00000083676.1 | 49.3168   | 1529.198  | 31.00764851 |
| Mir5100    | ENSMUSG00000092734.1 | 88.5256   | 1356.4469 | 15.3226513  |
| Mirlet7g   | ENSMUSG00000065440.1 | 260.1841  | 1329.393  | 5.109432129 |
| Mir203     | ENSMUSG00000065574.1 | 110.6     | 1312.204  | 11.8644123  |
| Mirlet7c-2 | ENSMUST00000083674.1 | 518.882   | 1302.325  | 2.509867369 |
| Mir5126    | ENSMUST00000175513.1 | 863.767   | 1298.045  | 1.50277216  |
| Mir10b     | ENSMUST00000083566.2 | 177.355   | 1174.837  | 6.624211328 |
| Mir5112    | ENSMUSG00000092638.1 | 35.6625   | 1034.777  | 29.01582895 |
| Mirlet7f-2 | ENSMUST00000083668.1 | 343.147   | 965.111   | 2.812529324 |
| Mir27a     | ENSMUST00000083510.1 | 193.6441  | 893.084   | 4.611986629 |
| Mir19b-2   | ENSMUST00000083539.1 | 112.7751  | 868.212   | 7.698614322 |
| Mirlet7c-1 | ENSMUSG00000065557.2 | 361.155   | 861.361   | 2.385017513 |
| Mir140     | ENSMUSG00000065439.1 | 17.9234   | 816.772   | 45.57014852 |
| Mir106b    | ENSMUSG00000065514.1 | 106.358   | 810.65    | 7.621899622 |
| Mir19b-1   | ENSMUST00000102301.1 | 98.448    | 765.517   | 7.775851211 |
| Mir425     | ENSMUST00000083645.1 | 38.0733   | 712.9557  | 18.72587089 |
| Mir1900    | ENSMUSG00000084663.1 | 81.2055   | 702.4892  | 8.650758877 |
| Mir183     | ENSMUSG00000065619.2 | 0         | 682.8239  |             |
| Mir103-2   | ENSMUST00000083629.1 | 196.22    | 682.289   | 3.477163388 |
| Mir93      | ENSMUSG00000065527.1 | 47.9814   | 678.321   | 14.13716565 |
| Mir103-1   | ENSMUSG00000065553.1 | 195.8214  | 671.496   | 3.429124702 |
| Mir182     | ENSMUSG00000076361.1 | 40.973    | 669.0016  | 16.32786469 |
| Mir31      | ENSMUSG00000065408.1 | 23.6661   | 639.6094  | 27.02639641 |
| Mir1961    | ENSMUSG00000089268.1 | 23.7726   | 637.2842  | 26.80750949 |
| Mir16-2    | ENSMUSG00000065606.1 | 141.0338  | 628.661   | 4.457520112 |
| Mir30e     | ENSMUSG00000065409.1 | 21.6168   | 546.2993  | 25.27197828 |
| Mir92-1    | ENSMUSG00000076062.1 | 14.3923   | 537.1531  | 37.32225565 |
| Mirlet7a-2 | ENSMUSG00000092770.1 | 182.3699  | 521.703   | 2.860685892 |
| Mirlet7a-1 | ENSMUSG00000065421.2 | 154.9924  | 503.108   | 3.246017224 |
| Mirlet7d   | ENSMUST00000083519.1 | 64.3387   | 500.797   | 7.783760008 |
| Mir150     | ENSMUSG00000065495.1 | 0         | 497.815   |             |
| Mir125b-2  | ENSMUSG00000065472.1 | 237.436   | 490.2327  | 2.064694065 |
| Mir24-2    | ENSMUST00000083607.1 | 140.1455  | 479.182   | 3.419175072 |
| Mir8114    | ENSMUST00000183582.1 | 120.96965 | 468.613   | 3.873806364 |
| Mir29b-1   | ENSMUST00000083670.1 | 15.4662   | 443.759   | 28.69218037 |
| Mir17      | ENSMUST00000083574.1 | 112.8583  | 431.763   | 3.825708876 |
| Mir125a    | ENSMUSG00000065479.1 | 194.38578 | 418.9449  | 2.155224009 |
| Mir29b-2   | ENSMUSG00000065412.2 | 12.9301   | 393.742   | 30.45158197 |

|           |                      |             |          |             |
|-----------|----------------------|-------------|----------|-------------|
| Mir125b-1 | ENSMUSG00000093354.1 | 189.378     | 390.169  | 2.060265712 |
| Mir345    | ENSMUST00000083495.1 | 79.01686    | 389.5542 | 4.930013671 |
| Mir26b    | ENSMUST00000083534.1 | 260.0754    | 384.545  | 1.47859044  |
| Mir126a   | ENSMUST00000083606.1 | 0           | 373.147  |             |
| Mir3068   | ENSMUST00000083004.1 | 101.725     | 365.7393 | 3.595372819 |
| Mir19a    | ENSMUSG00000065416.1 | 0           | 362.564  |             |
| Mir27b    | ENSMUST00000083541.1 | 0           | 346.4779 |             |
| Mir652    | ENSMUSG00000076011.1 | 65.3752     | 322.9616 | 4.940124084 |
| Mir20a    | ENSMUSG00000065442.1 | 0           | 315.9133 |             |
| Mir22     | ENSMUST00000083595.1 | 7.16726E-30 | 296.117  | 4.13152E+31 |
| Mir146    | ENSMUSG00000065601.1 | 0           | 286.1431 |             |
| Mir15a    | ENSMUST00000175266.1 | 0.000169239 | 230.509  | 1362032.392 |
| Mir3060   | ENSMUSG00000093080.1 | 101.14      | 229.205  | 2.266215147 |
| Mir18     | ENSMUST00000083469.1 | 78.45823    | 228.5649 | 2.913204899 |
| Mir802    | ENSMUSG00000076457.1 | 0           | 215.7689 |             |
| Mir133a-1 | ENSMUST00000083465.1 | 0           | 210.5098 |             |
| Mir148a   | ENSMUSG00000065505.1 | 8.9672      | 207.86   | 23.1800339  |
| Mir5099   | ENSMUSG00000092998.1 | 0           | 204.7156 |             |
| Mir3100   | ENSMUSG00000092659.1 | 150.386     | 203.6243 | 1.354011012 |
| Mir3963   | ENSMUSG00000092830.1 | 0           | 197.2544 |             |
| Mir423    | ENSMUSG00000065518.2 | 6.88462     | 192.9491 | 28.02610747 |
| Mir1247   | ENSMUSG00000080356.1 | 154.3272    | 192.5977 | 1.247982857 |
| Mir107    | ENSMUSG00000065594.1 | 54.6206     | 190.3094 | 3.484205593 |
| Mir1945   | ENSMUSG00000088544.1 | 22.8779     | 186.596  | 8.15616818  |
| Mir130a   | ENSMUST00000083550.1 | 211.524     | 181.3982 | 0.857577391 |
| Mir5117   | ENSMUSG00000065160.1 | 0           | 179.3128 |             |
| Mir574    | ENSMUSG00000077042.2 | 121.849     | 175.844  | 1.443130432 |
| Mir186    | ENSMUST00000083497.1 | 22.042      | 171.6925 | 7.789333999 |
| Mir7672   | ENSMUST00000184349.1 | 220.219     | 163.1352 | 0.740786217 |
| Mir185    | ENSMUSG00000065464.1 | 0           | 156.223  |             |
| Mir196b   | ENSMUSG00000065443.1 | 19.6982     | 153.3961 | 7.787315592 |
| Mir503    | ENSMUST00000102168.1 | 0           | 144.8199 |             |
| Mir744    | ENSMUST00000103261.1 | 0           | 144.7817 |             |
| Mir181a-2 | ENSMUST00000083489.1 | 0           | 138.6642 |             |
| Mir717    | ENSMUSG00000076214.1 | 514.7951    | 138.228  | 0.268510714 |
| Mir5131   | ENSMUST00000175426.1 | 146.8719    | 137.7874 | 0.93814678  |
| Mir1983   | ENSMUST00000157523.1 | 16.9478     | 136.172  | 8.034789176 |
| Mir133a-2 | ENSMUST00000083526.1 | 0           | 134.5549 |             |
| Mir147    | ENSMUST00000102354.2 | 0           | 134.4315 |             |

|           |                      |          |          |             |
|-----------|----------------------|----------|----------|-------------|
| Mir29c    | ENSMUSG00000065548.1 | 0        | 131.9434 |             |
| Mirlet7i  | ENSMUST00000083472.2 | 23.1966  | 128.8228 | 5.553520775 |
| Mir101a   | ENSMUST00000083517.1 | 0        | 115.3006 |             |
| Mir7-2    | ENSMUSG00000065609.1 | 33.6854  | 113.5778 | 3.371721874 |
| Mir341    | ENSMUSG00000070101.1 | 170.6122 | 113.3567 | 0.664411455 |
| Mir181a-1 | ENSMUST00000083631.1 | 0        | 112.3415 |             |
| Mir210    | ENSMUSG00000065551.1 | 0        | 110.2281 |             |
| Mir378c   | ENSMUST00000184478.1 | 0        | 107.8456 |             |
| Mir365-1  | ENSMUST00000083515.1 | 45.2313  | 102.5945 | 2.268219131 |
| Mir199a-1 | ENSMUSG00000065547.1 | 7.718    | 100.355  | 13.00272091 |
| Mir762    | ENSMUSG00000076454.1 | 37.8262  | 99.9531  | 2.642430379 |
| Mir122    | ENSMUST00000083468.1 | 0        | 99.9227  |             |
| Mir33     | ENSMUST00000083531.1 | 0        | 99.5146  |             |
| Mir342    | ENSMUSG00000065436.1 | 73.7459  | 97.7418  | 1.325386225 |
| Mir374b   | ENSMUST00000102314.1 | 0        | 97.68393 |             |
| Mir144    | ENSMUSG00000065401.1 | 0        | 88.7005  |             |
| Mir99a    | ENSMUSG00000065530.1 | 104.23   | 85.7015  | 0.822234481 |
| Mir7-1    | ENSMUSG00000065434.1 | 24.9955  | 84.7354  | 3.390026205 |
| Mir718    | ENSMUSG00000076127.1 | 78.3628  | 82.8833  | 1.057686811 |
| Mir1957a  | ENSMUSG00000088552.1 | 27.1997  | 77.7339  | 2.857895491 |
| Mir25     | ENSMUSG00000065394.1 | 0        | 76.1275  |             |
| Mir361    | ENSMUSG00000065510.1 | 0        | 75.2315  |             |
| Mir340    | ENSMUSG00000065417.1 | 0        | 74.6328  |             |
| Mir1948   | ENSMUSG00000087950.1 | 96.2838  | 73.9492  | 0.768033667 |
| Mir7240   | ENSMUSG00000099031.1 | 49.0631  | 72.8168  | 1.484145926 |
| Mir674    | ENSMUST00000102421.1 | 0        | 72.1656  |             |
| Mir98     | ENSMUST00000083602.2 | 0        | 67.8007  |             |
| Mir193a   | ENSMUST00000083461.1 | 0        | 66.5553  |             |
| Mir196a-1 | ENSMUSG00000065546.1 | 2.75961  | 66.3291  | 24.03567895 |
| Mir28a    | ENSMUSG00000065494.1 | 0        | 66.0922  |             |
| Mir483    | ENSMUSG00000070140.1 | 0        | 64.86761 |             |
| Mir872    | ENSMUST00000104728.1 | 0        | 62.6605  |             |
| Mir21c    | ENSMUSG00000099326.1 | 0        | 61.093   |             |
| Mir152    | ENSMUST00000083581.1 | 0        | 60.9892  |             |
| Mir700    | ENSMUST00000102169.1 | 4.32954  | 59.61031 | 13.76827792 |
| Mir8109   | ENSMUSG00000098388.1 | 30.6001  | 58.7669  | 1.920480652 |
| Mir106a   | ENSMUSG00000065456.1 | 0        | 57.9363  |             |
| Mir582    | ENSMUST00000103758.2 | 42.85608 | 56.198   | 1.311319187 |
| Mir187    | ENSMUSG00000065532.1 | 0        | 55.4029  |             |

|             |                      |           |          |             |
|-------------|----------------------|-----------|----------|-------------|
| Mir5709     | ENSMUST00000176783.1 | 2.85611   | 54.6094  | 19.12020195 |
| Mir130b     | ENSMUSG00000065572.1 | 0         | 53.9914  |             |
| Mir1224     | ENSMUSG00000080669.1 | 0         | 53.8164  |             |
| Mir145b     | ENSMUSG00000098366.1 | 212.8334  | 53.1391  | 0.249674628 |
| Mir196a-2   | ENSMUSG00000065488.1 | 0         | 52.774   |             |
| Mir365-2    | ENSMUST00000083555.1 | 22.9845   | 52.134   | 2.268224238 |
| Mir96_      | ENSMUSG00000065586.1 | 0         | 51.6659  |             |
| Mir3106     | ENSMUST00000175401.1 | 343.55    | 51.0791  | 0.14868025  |
| Mir92-2     | ENSMUST00000083679.1 | 0         | 48.07866 |             |
| Mir99b      | ENSMUST00000083462.1 | 0         | 47.1088  |             |
| Mir149      | ENSMUSG00000065470.1 | 0         | 46.38507 |             |
| Mir20b      | ENSMUST00000102087.1 | 0         | 45.5841  |             |
| Mir128-1    | ENSMUST00000083586.1 | 0         | 45.23755 |             |
| Mir7075     | ENSMUST00000184187.1 | 36.775788 | 43.3489  | 1.17873477  |
| Mir877      | ENSMUST00000104738.1 | 13.4901   | 42.9332  | 3.182570922 |
| Mir1901     | ENSMUSG00000084565.1 | 24.8797   | 42.8569  | 1.722564983 |
| Mir136      | ENSMUSG00000070129.1 | 0         | 42.5626  |             |
| Mir5106     | ENSMUST00000174936.1 | 0         | 40.8126  |             |
| Mir6958     | ENSMUSG00000098663.1 | 0         | 40.2843  |             |
| Mir133b     | ENSMUSG00000065480.1 | 0         | 40.02365 |             |
| Mir434      | ENSMUSG00000070133.1 | 0         | 39.13195 |             |
| Mir615      | ENSMUST00000102056.1 | 45.2722   | 38.88904 | 0.859004864 |
| Mir153      | ENSMUSG00000065538.1 | 0         | 38.6359  |             |
| Mir6936     | ENSMUSG00000098282.1 | 42.3006   | 38.5199  | 0.910623017 |
| Mir199b     | ENSMUSG00000092807.1 | 9.03561   | 37.6519  | 4.16705679  |
| Mir15b      | ENSMUSG00000065580.1 | 7.69686   | 37.1318  | 4.824278992 |
| Mir7008     | ENSMUSG00000098890.1 | 145.3824  | 36.59128 | 0.251689888 |
| Mir1839     | ENSMUST00000175366.1 | 33.2215   | 35.80242 | 1.077688244 |
| Mir181b-1   | ENSMUST00000083524.1 | 0         | 35.6269  |             |
| Mir301      | ENSMUSG00000065589.1 | 16.7058   | 35.1968  | 2.10686109  |
| Mir7654     | ENSMUSG00000098917.1 | 7.5287    | 35.1494  | 4.668721031 |
| mmu-mir-191 | ENSMUSG00000103103.1 | 4.88461   | 34.48747 | 7.060434712 |
| Mir7003     | ENSMUSG00000099091.1 | 0         | 33.7996  |             |
| Mir221      | ENSMUSG00000065422.1 | 0         | 32.6159  |             |
| Mir100      | ENSMUSG00000093011.1 | 0         | 32.3572  |             |
| Mir412      | ENSMUST00000083636.1 | 17.6188   | 31.238   | 1.772992485 |
| Mir6933     | ENSMUST00000184982.1 | 0         | 31.2323  |             |
| Mir362      | ENSMUST00000093592.1 | 0         | 30.85722 |             |
| Mir199a-2   | ENSMUSG00000070126.1 | 1.87665   | 30.7005  | 16.3592039  |



|           |                      |          |          |             |
|-----------|----------------------|----------|----------|-------------|
| Mir339    | ENSMUST00000083659.1 | 0        | 30.69531 |             |
| Mir128-2  | ENSMUST00000083507.1 | 13.8653  | 30.57908 | 2.205439478 |
| Mir101b   | ENSMUSG00000065556.1 | 8.22029  | 29.558   | 3.59573689  |
| Mir455    | ENSMUST00000093594.1 | 0        | 29.25225 |             |
| Mir324    | ENSMUST00000083600.1 | 0        | 28.8558  |             |
| Mir672    | ENSMUST00000102331.1 | 0        | 28.3244  |             |
| Mir541    | ENSMUST00000102097.1 | 0        | 28.20714 |             |
| Mir8102   | ENSMUSG00000098919.1 | 38.71212 | 27.91912 | 0.721198426 |
| Mir326    | ENSMUST00000083637.1 | 0        | 27.43728 |             |
| Mir337    | ENSMUSG00000065526.3 | 0        | 26.9399  |             |
| Mir148b   | ENSMUSG00000065560.1 | 0        | 26.74135 |             |
| Mir181b-2 | ENSMUST00000083644.1 | 0        | 26.73158 |             |
| Mir668    | ENSMUST00000183620.1 | 6.68318  | 26.12231 | 3.908664737 |
| Mir677    | ENSMUSG00000093245.1 | 0        | 26.06787 |             |
| Mir7662   | ENSMUST00000184761.1 | 1.70698  | 25.1882  | 14.75600183 |
| Mir7040   | ENSMUST00000184661.1 | 7.61529  | 24.9814  | 3.280426615 |
| Mir3113   | ENSMUSG00000093219.1 | 18.321   | 24.93174 | 1.360828557 |
| Mir34a    | ENSMUST00000083559.1 | 58.8817  | 23.56345 | 0.400182909 |
| Mir328    | ENSMUST00000093622.1 | 0        | 23.127   |             |
| Mir675    | ENSMUSG00000076275.1 | 0        | 22.7237  |             |
| Mir7071   | ENSMUST00000184847.1 | 60.0436  | 22.4751  | 0.374312999 |
| Mir330    | ENSMUST00000083609.1 | 0        | 22.09056 |             |
| Mir214    | ENSMUSG00000065516.1 | 0        | 21.9718  |             |
| Mir190a   | ENSMUST00000102424.1 | 0        | 21.7084  |             |
| Mir421    | ENSMUST00000083575.2 | 0        | 21.5385  |             |
| Mir146b   | ENSMUSG00000070127.2 | 0        | 21.29503 |             |
| Mir92b    | ENSMUST00000102300.2 | 0        | 21.1522  |             |
| Mir3473d  | ENSMUST00000175346.1 | 0        | 20.9582  |             |
| Mir7648   | ENSMUST00000183650.1 | 0        | 20.544   |             |
| Mir222    | ENSMUST00000083537.1 | 0        | 20.18761 |             |
| Mir1932   | ENSMUSG00000088015.1 | 22.0367  | 20.058   | 0.910208879 |
| Mir486    | ENSMUSG00000070084.3 | 3.78775  | 19.2763  | 5.08911623  |
| Mir758    | ENSMUST00000103260.1 | 0        | 18.84647 |             |
| Mir224    | ENSMUSG00000065542.1 | 3.59529  | 18.2243  | 5.068937415 |
| Mir181c   | ENSMUSG00000065483.1 | 1.24558  | 17.4863  | 14.03868078 |
| Mir1897   | ENSMUSG00000084530.2 | 21.79756 | 16.84071 | 0.772596107 |
| Mir212    | ENSMUST00000083656.1 | 16.0107  | 16.57673 | 1.035353233 |
| Mir490    | ENSMUSG00000070075.1 | 0        | 16.5689  |             |
| Mir7235   | ENSMUST00000183796.1 | 0        | 16.0079  |             |

|            |                      |             |            |             |
|------------|----------------------|-------------|------------|-------------|
| Mir3569    | ENSMUSG00000098553.1 | 22.8961     | 15.943     | 0.696319461 |
| Mir5625    | ENSMUSG00000093710.1 | 37.8087     | 15.8649    | 0.419609772 |
| Mir500     | ENSMUSG00000070108.2 | 0           | 15.85214   |             |
| Mir7076    | ENSMUSG00000099129.1 | 0           | 15.8361685 |             |
| Mir669a-11 | ENSMUST00000179742.1 | 0           | 15.1306    |             |
| Mir598     | ENSMUST00000102094.3 | 23.7658     | 15.0182    | 0.631924867 |
| Mir6918    | ENSMUSG00000098296.1 | 0           | 14.8119    |             |
| Mir501     | ENSMUST00000102296.1 | 459.5762    | 14.53529   | 0.031627595 |
| Mir693     | ENSMUST00000102187.1 | 0           | 14.033524  |             |
| Mir1960    | ENSMUSG00000088113.1 | 0           | 13.6301    |             |
| Mir3096    | ENSMUST00000116685.1 | 0           | 13.586     |             |
| Mir369     | ENSMUST00000083627.2 | 4.39962     | 13.3836    | 3.04198999  |
| Mir3077    | ENSMUSG00000092784.1 | 4.13509     | 13.25448   | 3.205366751 |
| Mir379     | ENSMUSG00000065498.3 | 0           | 13.024     |             |
| Mir219a-1  | ENSMUSG00000065555.1 | 0.000166892 | 12.934877  | 77504.47595 |
| Mir195a    | ENSMUSG00000065411.2 | 104.2532    | 12.5854    | 0.120719556 |
| Mir411     | ENSMUSG00000065477.2 | 0           | 12.54403   |             |
| Mir7211    | ENSMUST00000184071.1 | 0           | 12.4968    |             |
| Mir298     | ENSMUSG00000065410.1 | 0           | 12.1373    |             |
| Mir3547    | ENSMUSG00000093202.2 | 0           | 12.12809   |             |
| Mir6959    | ENSMUST00000184827.1 | 0           | 12.121298  |             |
| Mir6984    | ENSMUST00000185105.1 | 0           | 12.0134    |             |
| Mir532     | ENSMUSG00000070139.1 | 0           | 11.5761    |             |
| Mir127     | ENSMUSG00000070076.1 | 0           | 11.5635    |             |
| Mir331     | ENSMUSG00000065607.1 | 0           | 11.428     |             |
| Mir8101    | ENSMUSG00000098863.1 | 116.8116    | 11.426285  | 0.097818068 |
| Mir671     | ENSMUSG00000076387.1 | 11.8732     | 11.370882  | 0.957693124 |
| Mir154     | ENSMUST00000083514.1 | 99.4588     | 11.3568    | 0.114185974 |
| Mir3104    | ENSMUSG00000092652.1 | 0           | 11.3046    |             |
| Mir5122    | ENSMUSG00000092745.1 | 2.12116     | 11.1551    | 5.258962077 |
| Mir335     | ENSMUST00000083567.1 | 0           | 11.12344   |             |
| Mir467d    | ENSMUST00000103833.2 | 0           | 10.9618    |             |
| Mir5130    | ENSMUST00000175160.1 | 1.75813E-36 | 10.901995  | 6.2009E+36  |
| Mir291b    | ENSMUSG00000078032.1 | 16.5668     | 10.76067   | 0.649532197 |
| Mir7046    | ENSMUSG00000098802.1 | 0           | 10.5443    |             |
| Mir1199    | ENSMUST00000117015.1 | 6.1964E-102 | 10.3965    | 1.6778E+102 |
| Mir1968    | ENSMUST00000157429.1 | 0           | 10.1329    |             |
| Mir188     | ENSMUSG00000065398.1 | 0           | 10.0887    |             |
| Mir378b    | ENSMUSG00000092985.1 | 0           | 9.98646    |             |

|           |                      |             |         |             |
|-----------|----------------------|-------------|---------|-------------|
| Mir7019   | ENSMUST00000183998.1 | 3.35473     | 9.48575 | 2.827574797 |
| Mir300    | ENSMUST00000083485.2 | 0           | 9.43908 |             |
| Mir32     | ENSMUSG00000065544.1 | 0           | 9.35358 |             |
| Mir8112   | ENSMUSG00000098623.1 | 0           | 9.07021 |             |
| Mir6406   | ENSMUSG00000099174.1 | 5.401       | 8.76736 | 1.623284577 |
| Mir7013   | ENSMUSG00000099033.1 | 0           | 8.6657  |             |
| Mir6921   | ENSMUSG00000098547.1 | 0           | 8.42672 |             |
| Mir206    | ENSMUST00000083625.1 | 19.8416     | 8.34547 | 0.420604689 |
| Mir382    | ENSMUSG00000065428.3 | 113.742     | 8.11414 | 0.071338116 |
| Mir450b   | ENSMUSG00000076050.1 | 0           | 8.1134  |             |
| Mir6979   | ENSMUSG00000098706.1 | 0           | 8.09599 |             |
| Mir329    | ENSMUST00000083643.1 | 0           | 7.70899 |             |
| Mir6349   | ENSMUSG00000098833.1 | 0           | 7.68822 |             |
| Mir1193   | ENSMUSG00000080411.1 | 2.64333     | 7.52933 | 2.848426038 |
| Mir5132   | ENSMUSG00000092907.1 | 0           | 7.29308 |             |
| Mir666    | ENSMUSG00000076272.1 | 0           | 7.27816 |             |
| Mir350    | ENSMUSG00000065573.1 | 0           | 7.14076 |             |
| Mir137    | ENSMUST00000083635.1 | 0.000783821 | 7.01463 | 8949.275409 |
| Mir135a-1 | ENSMUSG00000065407.1 | 80.9461     | 6.89443 | 0.085173097 |
| Mir467a-3 | ENSMUST00000178082.1 | 0           | 6.79213 |             |
| Mir495    | ENSMUSG00000070105.2 | 0           | 6.51201 |             |
| Mir6377   | ENSMUSG00000098401.1 | 0           | 6.48323 |             |
| Mir1306   | ENSMUST00000116802.2 | 0           | 6.22477 |             |
| Mir487b   | ENSMUST00000102265.1 | 0           | 6.08505 |             |
| Mir1934   | ENSMUST00000158127.1 | 0           | 5.88617 |             |
| Mir18b    | ENSMUST00000103923.2 | 0           | 5.88617 |             |
| Mir467a-9 | ENSMUSG00000095222.1 | 0           | 5.80197 |             |
| Mir34b    | ENSMUST00000083558.1 | 0           | 5.69628 |             |
| Mir540    | ENSMUSG00000072900.1 | 0           | 5.69628 |             |
| Mir378d   | ENSMUSG00000098756.1 | 0           | 5.51512 |             |
| Mir6238   | ENSMUSG00000099176.1 | 0           | 5.4807  |             |
| Mir1981   | ENSMUSG00000088559.1 | 12.6001     | 5.44983 | 0.432522758 |
| Mir7b     | ENSMUST00000083557.1 | 0           | 5.37088 |             |
| Mir3102   | ENSMUST00000175555.1 | 0           | 5.31024 |             |
| Mir7070   | ENSMUSG00000099076.1 | 0           | 5.26132 |             |
| Mir3474   | ENSMUSG00000093120.1 | 0           | 5.07227 |             |
| Mir1249   | ENSMUST00000116791.1 | 0           | 5.06969 |             |
| Mir381    | ENSMUST00000083632.2 | 0           | 4.71954 |             |
| Mir1964   | ENSMUST00000158514.1 | 0           | 4.66675 |             |

|           |                      |             |            |             |
|-----------|----------------------|-------------|------------|-------------|
| Mir5108   | ENSMUSG00000093017.1 | 4.5176      | 4.59573    | 1.017294581 |
| Mir431    | ENSMUSG00000070080.1 | 0           | 4.5801     |             |
| Mir505    | ENSMUST00000093573.2 | 0           | 4.57816    |             |
| Mir676    | ENSMUST00000102443.1 | 0           | 4.53657    |             |
| Mir449a   | ENSMUST00000083641.1 | 0           | 4.48385    |             |
| Mir297a-2 | ENSMUSG00000076983.2 | 0           | 4.41161    |             |
| Mir8120   | ENSMUST00000185035.1 | 0           | 4.40676    |             |
| Mir132    | ENSMUST00000083603.1 | 0           | 4.26584228 |             |
| Mir129-1  | ENSMUST00000083535.1 | 0           | 4.19261    |             |
| Mir5623   | ENSMUST00000176631.1 | 0           | 4.14447    |             |
| Mir322    | ENSMUSG00000065418.1 | 20.0384     | 4.07699    | 0.203458859 |
| Mir7011   | ENSMUSG00000098655.1 | 0           | 4.04498    |             |
| Mir432    | ENSMUSG00000087855.1 | 0           | 3.89028    |             |
| Mir466d   | ENSMUSG00000078031.1 | 0           | 3.7106     |             |
| Mir138-1  | ENSMUST00000083480.1 | 0           | 3.64399    |             |
| Mir5119   | ENSMUST00000175435.1 | 0           | 3.57603    |             |
| Mir669a-1 | ENSMUSG00000096583.1 | 0           | 3.56708    |             |
| Mir669a-6 | ENSMUST00000102064.1 | 0           | 3.56708    |             |
| Mir8097   | ENSMUST00000185150.1 | 47.42631    | 3.562015   | 0.075106307 |
| Mir3968   | ENSMUST00000175355.1 | 4.97064     | 3.55195    | 0.714586049 |
| Mir124a-3 | ENSMUST00000083520.1 | 30.1542     | 3.45043    | 0.114426183 |
| Mir7045   | ENSMUSG00000098762.1 | 0.911637    | 3.42507    | 3.757054617 |
| Mir6356   | ENSMUSG00000099300.1 | 0           | 3.3688     |             |
| Mir6943   | ENSMUSG00000099058.1 | 0           | 3.35298    |             |
| Mir134    | ENSMUSG00000065426.2 | 0           | 3.33856    |             |
| Mir6370   | ENSMUSG00000099149.1 | 0           | 3.29664    |             |
| Mir184    | ENSMUST00000083662.1 | 4.01674     | 3.26896    | 0.813834104 |
| Mir138-2  | ENSMUSG00000065512.2 | 16.0033     | 3.25601    | 0.203458662 |
| Mir8098   | ENSMUSG00000099245.1 | 11.3642     | 3.19483    | 0.281131096 |
| Mir7677   | ENSMUST00000184226.1 | 5.50993     | 3.192237   | 0.579360718 |
| Mir760    | ENSMUSG00000076456.1 | 0           | 3.141688   |             |
| Mir7027   | ENSMUSG00000098731.1 | 19.3915     | 3.11573    | 0.160675038 |
| Mir8104   | ENSMUST00000185165.1 | 7.91254E-07 | 3.04727    | 3851190.642 |
| Mir6952   | ENSMUSG00000098451.1 | 0           | 2.9872     |             |
| Mir338    | ENSMUSG00000065600.1 | 0           | 2.90216    |             |
| Mir99ahg  | ENSMUST00000182398.3 | 5.17424     | 2.883777   | 0.557333444 |
| Mir5134   | ENSMUSG00000093270.1 | 0           | 2.87644    |             |
| Mir142hg  | ENSMUSG00000084796.1 | 0.238752    | 2.84264    | 11.90624581 |
| Mir217    | ENSMUSG00000065415.1 | 0           | 2.79764    |             |

|            |                      |            |            |             |
|------------|----------------------|------------|------------|-------------|
| Mir1949    | ENSMUSG00000088059.1 | 0          | 2.77865    |             |
| Mir680-2   | ENSMUSG00000076117.1 | 0          | 2.75013    |             |
| Mir323     | ENSMUST00000083683.1 | 99.92444   | 2.67074    | 0.026727595 |
| Mir218-1   | ENSMUSG00000065603.1 | 1.0671     | 2.66604    | 2.498397526 |
| Mir3473e   | ENSMUST00000183932.1 | 0          | 2.49247    |             |
| Mir218-2   | ENSMUSG00000065583.1 | 1.51187    | 2.48444    | 1.643289436 |
| Mir8105    | ENSMUSG00000098957.1 | 2.98897    | 2.43252    | 0.81383219  |
| Mir129-2   | ENSMUSG00000065511.1 | 0          | 2.35977    |             |
| Mir6244    | ENSMUSG00000099311.1 | 12.9755    | 2.34033    | 0.180365304 |
| Mir6916    | ENSMUSG00000099292.1 | 0          | 2.30376    |             |
| Mir7666    | ENSMUST00000183849.1 | 0          | 2.11558    |             |
| Mir1938    | ENSMUSG00000089371.1 | 61.9531    | 2.04891    | 0.033071953 |
| Mir7060    | ENSMUSG00000098267.1 | 0          | 1.9121     |             |
| Mir1191    | ENSMUSG00000080533.1 | 0          | 1.74251    |             |
| Mir3076    | ENSMUSG00000093156.1 | 0          | 1.70507    |             |
| Mir124a-2  | ENSMUSG00000093073.1 | 16.3536    | 1.63152    | 0.099765189 |
| Mir6417    | ENSMUSG00000098726.1 | 5.89705    | 1.59543    | 0.270547138 |
| Mir3109    | ENSMUSG00000093042.1 | 0          | 1.48719    |             |
| Mir124-2hg | ENSMUST00000186923.1 | 0.00015064 | 1.452937   | 9645.094264 |
| Mir6981    | ENSMUSG00000098608.1 | 0          | 1.43695    |             |
| Mir702     | ENSMUST00000102285.1 | 2.11236    | 1.31251    | 0.621347687 |
| Mir299b    | ENSMUSG00000093291.1 | 0          | 1.17333    |             |
| Mir6941    | ENSMUST00000184711.1 | 2.19302    | 1.15342    | 0.525950516 |
| Mir8111    | ENSMUSG00000098823.1 | 0          | 1.04477    |             |
| Mir5110    | ENSMUST00000175537.1 | 0          | 1.03513    |             |
| Mir1947    | ENSMUSG00000088860.1 | 15.7143    | 0.989288   | 0.062954634 |
| Mir7068    | ENSMUSG00000099079.1 | 4.7437     | 0.897642   | 0.18922824  |
| Mir3074-1  | ENSMUSG00000092741.1 | 5.76691    | 0.782218   | 0.135639016 |
| Mir22hg    | ENSMUST00000134345.1 | 2.17207    | 0.51152    | 0.235498856 |
| Mir124-2hg | ENSMUST00000189754.1 | 1.08238    | 0.24572323 | 0.227021219 |
| Mir124-2hg | ENSMUST00000189467.1 | 3.70091    | 0.209082   | 0.056494754 |
| Mir124a-1  | ENSMUST00000083663.1 | 30.7759    | 0.00040736 | 1.32362E-05 |
| Mir1896    | ENSMUST00000122641.1 | 18.8082    | 0.00011116 | 5.90992E-06 |
| Mir99ahg   | ENSMUST00000182548.1 | 2.016994   | 8.8581E-07 | 4.39171E-07 |
| Mir6944    | ENSMUST00000182548.1 | 86.5956    | 0          | 0           |
| Mir7044    | ENSMUSG00000098583.1 | 63.6571    | 0          | 0           |
| Mir7223    | ENSMUST00000183433.1 | 54.9027    | 0          | 0           |
| Mir494     | ENSMUSG00000070141.2 | 54.2112    | 0          | 0           |
| Mir7671    | ENSMUSG00000099153.1 | 39.2505    | 0          | 0           |

|          |                      |         |   |   |
|----------|----------------------|---------|---|---|
| Mir7007  | ENSMUST00000184606.1 | 26.6807 | 0 | 0 |
| Mir6368  | ENSMUSG00000099158.1 | 19.9119 | 0 | 0 |
| Mir878   | ENSMUST00000104680.1 | 17.1584 | 0 | 0 |
| Mir8092  | ENSMUSG00000099118.1 | 16.7424 | 0 | 0 |
| Mir707   | ENSMUSG00000076051.1 | 15.8084 | 0 | 0 |
| Mir1231  | ENSMUST00000175639.1 | 15.0984 | 0 | 0 |
| Mir6414  | ENSMUSG00000098264.1 | 14.954  | 0 | 0 |
| Mir292   | ENSMUSG00000078041.1 | 14.954  | 0 | 0 |
| Mir204   | ENSMUSG00000065507.2 | 12.485  | 0 | 0 |
| Mir6996  | ENSMUSG00000098548.1 | 11.694  | 0 | 0 |
| Mir7058  | ENSMUST00000184637.1 | 9.9898  | 0 | 0 |
| Mir7236  | ENSMUST00000184435.1 | 9.1429  | 0 | 0 |
| Mir688   | ENSMUSG00000076009.1 | 8.86544 | 0 | 0 |
| Mir6385  | ENSMUSG00000098886.1 | 7.66388 | 0 | 0 |
| Mir3062  | ENSMUST00000174986.1 | 7.57894 | 0 | 0 |
| Mir6937  | ENSMUSG00000098579.1 | 5.47507 | 0 | 0 |
| Mir1197  | ENSMUST00000117037.1 | 5.401   | 0 | 0 |
| Mir7023  | ENSMUST00000185093.1 | 5.0642  | 0 | 0 |
| Mir1905  | ENSMUST00000122779.1 | 4.98467 | 0 | 0 |
| Mir3086  | ENSMUSG00000092813.1 | 4.23972 | 0 | 0 |
| Mir7016  | ENSMUSG00000098422.1 | 3.80327 | 0 | 0 |
| Mir7001  | ENSMUSG00000099238.1 | 3.68065 | 0 | 0 |
| Mir7039  | ENSMUSG00000098822.1 | 3.12336 | 0 | 0 |
| Mir142hg | ENSMUST00000123700.1 | 2.82696 | 0 | 0 |
| Mir433   | ENSMUSG00000070072.1 | 2.48227 | 0 | 0 |
| Mir207   | ENSMUSG00000065452.1 | 2.39072 | 0 | 0 |
| Mir6335  | ENSMUSG00000098734.1 | 2.33053 | 0 | 0 |
| Mir6241  | ENSMUST00000184225.1 | 2.17795 | 0 | 0 |
| Mir6350  | ENSMUSG00000098876.1 | 1.91597 | 0 | 0 |
| Mir6392  | ENSMUST00000184924.1 | 1.46402 | 0 | 0 |
| Mir99ahg | ENSMUST00000182986.1 | 1.20409 | 0 | 0 |

**Table S3.** RPKM values and fold change of miRNAs targeting TNF- $\alpha$  and IL-17A

| miRNA    | ENSEMBL No.          | TNF- $\alpha$ |           |                                        | IL-17A     |           |                                        |
|----------|----------------------|---------------|-----------|----------------------------------------|------------|-----------|----------------------------------------|
|          |                      | RPKM          |           | Fold change<br>(Sepsis/<br>Control EV) | RPKM       |           | Fold change<br>(Sepsis/<br>Control EV) |
|          |                      | Control EV    | Sepsis EV |                                        | Control EV | Sepsis EV |                                        |
| Mir320   | ENSMUSG00000065528.1 |               |           |                                        | 3538.031   | 49236.06  | 13.916232                              |
| Mir6240  | ENSMUSG00000098343.1 |               |           |                                        | 25941.69   | 37420     | 1.4424658                              |
| Mir21a   | ENSMUSG00000065455.1 |               |           |                                        | 718.601    | 16479.41  | 22.932629                              |
| Mir200a  | ENSMUST00000083466.1 |               |           |                                        | 225.1512   | 9292.76   | 41.27342                               |
| Mir200c  | ENSMUSG00000065462.2 |               |           |                                        | 297.7676   | 3704.962  | 12.442462                              |
| Mir26a-2 | ENSMUSG00000065430.1 |               |           |                                        | 450.714    | 3621.92   | 8.0359607                              |
| Mir200b  | ENSMUST00000083615.2 |               |           |                                        | 210.9703   | 3569.403  | 16.918983                              |
| Mir429   | ENSMUST00000083493.1 |               |           |                                        | 317.0862   | 2523.109  | 7.9571706                              |
| Mir30b   | ENSMUST00000083542.2 |               |           |                                        | 187.2548   | 2307.965  | 12.325265                              |
| Mir203   | ENSMUSG00000065574.1 |               |           |                                        | 110.6      | 1312.204  | 11.864412                              |
| Mir10b   | ENSMUST00000083566.2 |               |           |                                        | 177.355    | 1174.837  | 6.6242113                              |
| Mir5112  | ENSMUSG00000092638.1 | 35.6625       | 1034.777  | 29.015829                              | 35.6625    | 1034.777  | 29.015829                              |
| Mir27a   | ENSMUST00000083510.1 | 193.6441      | 893.084   | 4.6119866                              |            |           |                                        |
| Mir140   | ENSMUSG00000065439.1 |               |           |                                        | 17.9234    | 816.772   | 45.570149                              |
| Mir183   | ENSMUSG00000065619.2 |               |           |                                        | 0          | 682.8239  |                                        |
| Mir103-2 | ENSMUST00000083629.1 |               |           |                                        | 196.22     | 682.289   | 3.4771634                              |
| Mir103-1 | ENSMUSG00000065553.1 |               |           |                                        | 195.8214   | 671.496   | 3.4291247                              |
| Mir182   | ENSMUSG00000076361.1 |               |           |                                        | 40.973     | 669.0016  | 16.327865                              |
| Mir125a  | ENSMUSG00000065479.1 | 194.38578     | 418.9449  | 2.155224                               |            |           |                                        |
| Mir29b-2 | ENSMUSG00000065412.2 |               |           |                                        | 12.9301    | 393.742   | 30.451582                              |
| Mir26b   | ENSMUST00000083534.1 |               |           |                                        | 260.0754   | 384.545   | 1.4785904                              |
| Mir126a  | ENSMUST00000083606.1 |               |           |                                        | 0          | 373.147   |                                        |
| Mir3068  | ENSMUST00000083004.1 | 101.725       | 365.7393  | 3.5953728                              | 101.725    | 365.7393  | 3.5953728                              |
| Mir19a   | ENSMUSG00000065416.1 | 0             | 362.564   |                                        | 0          | 362.564   |                                        |
| Mir27b   | ENSMUST00000083541.1 | 0             | 346.4779  |                                        |            |           |                                        |
| Mir22    | ENSMUST00000083595.1 |               |           |                                        | 0          | 296.117   |                                        |
| Mir146a  | ENSMUSG00000065601.1 | 0             | 286.1431  |                                        |            |           |                                        |
| Mir3060  | ENSMUSG00000093080.1 |               |           |                                        | 101.14     | 229.205   | 2.2662151                              |
| Mir107   | ENSMUSG00000065594.1 |               |           |                                        | 54.6206    | 190.3094  | 3.4842056                              |
| Mir130a  | ENSMUST00000083550.1 | 211.524       | 181.3982  | 0.8575774                              |            |           |                                        |
| Mir185   | ENSMUSG00000065464.1 | 0             | 156.223   |                                        | 0          | 156.223   |                                        |

|         |                      |           |          |           |          |          |           |
|---------|----------------------|-----------|----------|-----------|----------|----------|-----------|
| Mir196b | ENSMUSG00000065443.1 | 19.6982   | 153.3961 | 7.7873156 | 19.6982  | 153.3961 | 7.7873156 |
| Mir101a | ENSMUST00000083517.1 | 0         | 115.3006 |           | 0        | 115.3006 |           |
| Mir210  | ENSMUSG00000065551.1 |           |          |           | 0        | 110.2281 |           |
| Mir762  | ENSMUSG00000076454.1 | 37.8262   | 99.9531  | 2.6424304 |          |          |           |
| Mir33   | ENSMUST00000083531.1 | 0         | 99.5146  |           |          |          |           |
| Mir99a  | ENSMUSG00000065530.1 | 104.23    | 85.7015  | 0.8222345 | 104.23   | 85.7015  | 0.8222345 |
| Mir25   | ENSMUSG00000065394.1 | 0         | 76.1275  |           | 0        | 76.1275  |           |
| Mir674  | ENSMUST00000102421.1 | 0         | 72.1656  |           |          |          |           |
| Mir582  | ENSMUST00000103758.2 | 42.85608  | 56.198   | 1.3113192 | 42.85608 | 56.198   | 1.3113192 |
| Mir130b | ENSMUSG00000065572.1 | 0         | 53.9914  |           | 0        | 53.9914  |           |
| Mir96   | ENSMUSG00000065586.1 |           |          |           | 0        | 51.6659  |           |
| Mir3106 | ENSMUST00000175401.1 |           |          |           | 343.55   | 51.0791  | 0.1486803 |
| Mir99b  | ENSMUST00000083462.1 | 0         | 47.1088  |           | 0        | 47.1088  |           |
| Mir149  | ENSMUSG00000065470.1 | 0         | 46.38507 |           | 0        | 46.38507 |           |
| Mir7075 | ENSMUST00000184187.1 | 36.775788 | 43.3489  | 1.1787348 |          |          |           |
| Mir877  | ENSMUST00000104738.1 |           |          |           | 13.4901  | 42.9332  | 3.1825709 |
| Mir133b | ENSMUSG00000065480.1 | 0         | 40.02365 |           |          |          |           |
| Mir6936 | ENSMUSG00000098282.1 | 42.3006   | 38.5199  | 0.910623  |          |          |           |
| Mir199b | ENSMUSG00000092807.1 | 9.03561   | 37.6519  | 4.1670568 |          |          |           |
| Mir1839 | ENSMUST00000175366.1 | 33.2215   | 35.80242 | 1.0776882 | 33.2215  | 35.80242 | 1.0776882 |
| Mir301a | ENSMUSG00000065589.1 | 16.7058   | 35.1968  | 2.1068611 |          |          |           |
| Mir7003 | ENSMUSG00000099091.1 | 0         | 33.7996  |           |          |          |           |
| Mir100  | ENSMUSG00000093011.1 | 0         | 32.3572  |           |          |          |           |
| Mir412  | ENSMUST00000083636.1 |           |          |           | 17.6188  | 31.238   | 1.7729925 |
| Mir101b | ENSMUSG00000065556.1 | 8.22029   | 29.558   | 3.5957369 | 8.22029  | 29.558   | 3.5957369 |
| Mir455  | ENSMUST00000093594.1 | 0         | 29.25225 |           |          |          |           |
| Mir326  | ENSMUST00000083637.1 |           |          |           | 0        | 27.43728 |           |
| Mir337  | ENSMUSG00000065526.3 | 0         | 26.9399  |           |          |          |           |
| Mir677  | ENSMUSG00000093245.1 | 0         | 26.06787 |           |          |          |           |
| Mir7662 | ENSMUST00000184761.1 |           |          |           | 1.70698  | 25.1882  | 14.756002 |
| Mir328  | ENSMUST00000093622.1 | 0         | 23.127   |           | 0        | 23.127   |           |
| Mir330  | ENSMUST00000083609.1 |           |          |           | 0        | 22.09056 |           |
| Mir421  | ENSMUST00000083575.2 |           |          |           | 0        | 21.5385  |           |
| Mir146b | ENSMUSG00000070127.2 |           |          |           | 0        | 21.29503 |           |
| Mir92b  | ENSMUST00000102300.2 | 0         | 21.1522  |           | 0        | 21.1522  |           |
| Mir7648 | ENSMUST00000183650.1 | 0         | 20.544   |           |          |          |           |
| Mir181c | ENSMUSG00000065483.1 | 1.24558   | 17.4863  | 14.038681 |          |          |           |



|         |                      |          |           |           |         |          |           |
|---------|----------------------|----------|-----------|-----------|---------|----------|-----------|
| Mir5625 | ENSMUSG00000093710.1 |          |           |           | 37.8087 | 15.8649  | 0.4196098 |
| Mir7076 | ENSMUSG00000099129.1 | 0        | 15.836168 |           |         |          |           |
| Mir6918 | ENSMUSG00000098296.1 |          |           |           | 0       | 14.8119  |           |
| Mir3096 | ENSMUST00000116685.1 | 0        | 13.586    |           |         |          |           |
| Mir411  | ENSMUSG00000065477.2 | 0        | 12.54403  |           |         |          |           |
| Mir298  | ENSMUSG00000065410.1 | 0        | 12.1373   |           |         |          |           |
| Mir3547 | ENSMUSG00000093202.2 | 0        | 12.12809  |           |         |          |           |
| Mir6959 | ENSMUST00000184827.1 | 0        | 12.121298 |           |         |          |           |
| Mir6984 | ENSMUST00000185105.1 |          |           |           | 0       | 12.0134  |           |
| Mir154  | ENSMUST00000083514.1 |          |           |           | 99.4588 | 11.3568  | 0.114186  |
| Mir335  | ENSMUST00000083567.1 |          |           |           | 0       | 11.12344 |           |
| Mir467d | ENSMUST00000103833.2 | 0        | 10.9618   |           |         |          |           |
| Mir291b | ENSMUSG00000078032.1 | 16.5668  | 10.76067  | 0.6495322 |         |          |           |
| Mir1199 | ENSMUST00000117015.1 | 0        | 10.3965   |           | 0       | 10.3965  |           |
| Mir188  | ENSMUSG00000065398.1 | 0        | 10.0887   |           |         |          |           |
| Mir300  | ENSMUST00000083485.2 |          |           |           | 0       | 9.43908  |           |
| Mir32   | ENSMUSG00000065544.1 | 0        | 9.35358   |           | 0       | 9.35358  |           |
| Mir450b | ENSMUSG00000076050.1 | 0        | 8.1134    |           | 0       | 8.1134   |           |
| Mir1193 | ENSMUSG00000080411.1 | 2.64333  | 7.52933   | 2.848426  |         |          |           |
| Mir5132 | ENSMUSG00000092907.1 | 0        | 7.29308   |           | 0       | 7.29308  |           |
| Mir350  | ENSMUSG00000065573.1 | 0        | 7.14076   |           |         |          |           |
| Mir137  | ENSMUST00000083635.1 |          |           |           | 0       | 7.01463  |           |
| Mir495  | ENSMUSG00000070105.2 |          |           |           | 0       | 6.51201  |           |
| Mir1934 | ENSMUST00000158127.1 |          |           |           | 0       | 5.88617  |           |
| Mir540  | ENSMUSG00000072900.1 | 0        | 5.69628   |           |         |          |           |
| Mir1981 | ENSMUSG00000088559.1 |          |           |           | 12.6001 | 5.44983  | 0.4325228 |
| Mir3102 | ENSMUST00000175555.1 | 0        | 5.31024   |           |         |          |           |
| Mir1249 | ENSMUST00000116791.1 |          |           |           | 0       | 5.06969  |           |
| Mir3968 | ENSMUST00000175355.1 |          |           |           | 4.97064 | 3.55195  | 0.714586  |
| Mir6370 | ENSMUSG00000099149.1 | 0        | 3.29664   |           |         |          |           |
| Mir184  | ENSMUST00000083662.1 | 4.01674  | 3.26896   | 0.8138341 |         |          |           |
| Mir760  | ENSMUSG00000076456.1 | 0        | 3.141688  |           |         |          |           |
| Mir7027 | ENSMUSG00000098731.1 | 19.3915  | 3.11573   | 0.160675  |         |          |           |
| Mir338  | ENSMUSG00000065600.1 | 0        | 2.90216   |           |         |          |           |
| Mir323  | ENSMUST00000083683.1 | 99.92444 | 2.67074   | 0.0267276 |         |          |           |
| Mir3076 | ENSMUSG00000093156.1 |          |           |           | 0       | 1.70507  |           |
| Mir3109 | ENSMUSG00000093042.1 | 0        | 1.48719   |           | 0       | 1.48719  |           |

|           |                      |         |         |   |         |          |           |
|-----------|----------------------|---------|---------|---|---------|----------|-----------|
| Mir6981   | ENSMUSG00000098608.1 | 0       | 1.43695 | 0 | 1.43695 |          |           |
| Mir5110   | ENSMUST00000175537.1 | 0       | 1.03513 |   |         |          |           |
| Mir7068   | ENSMUSG00000099079.1 |         |         |   | 4.7437  | 0.897642 | 0.1892282 |
| Mir3074-1 | ENSMUSG00000092741.1 |         |         |   | 5.76691 | 0.782218 | 0.135639  |
| Mir292a   | ENSMUSG00000078041.1 | 14.954  | 0       | 0 |         |          |           |
| Mir204    | ENSMUSG00000065507.2 | 12.485  | 0       | 0 | 12.485  | 0        | 0         |
| Mir7016   | ENSMUSG00000098422.1 |         |         |   | 3.80327 | 0        | 0         |
| Mir7058   | ENSMUST00000184637.1 | 9.9898  | 0       | 0 |         |          |           |
| Mir7236   | ENSMUST00000184435.1 | 9.1429  | 0       | 0 |         |          |           |
| Mir3062   | ENSMUST00000174986.1 | 7.57894 | 0       | 0 |         |          |           |
| Mir1197   | ENSMUST00000117037.1 | 5.401   | 0       | 0 |         |          |           |
| Mir7039   | ENSMUSG00000098822.1 |         |         |   | 3.12336 | 0        | 0         |
